# Supplementary material
Source: bioRxiv or medRxiv preprint supplement (https://www.biorxiv.org/highwire/filestream/109525/field_highwire_adjunct_files/0/354746-1.pdf)
Supplement: Supplementary file [file 354746-1.pdf]

1 **Supplemental Figures and Tables for:**

2 ***Drosophila small ovary* encodes a zinc-finger repressor required for ovarian**  
3 **differentiation**

4  
5  
6 Leif Benner<sup>1,2</sup>, Elias A. Castro<sup>3</sup>, Cale Whitworth<sup>1,4</sup>, Koen J.T. Venken<sup>5</sup>, Haiwang Yang<sup>1</sup>,  
7 Brian Oliver<sup>1,6,7</sup>, Kevin R. Cook<sup>4</sup>, and Dorothy A. Lerit<sup>3,6</sup>

8  
9 **Author affiliations:**

10 <sup>1</sup>Section of Developmental Genomics, Laboratory of Cellular and Developmental  
11 Biology, National Institute of Diabetes and Digestive and Kidney Diseases,  
12 National Institutes of Health, Bethesda MD 20892. <sup>2</sup>Department of Biology, Johns  
13 Hopkins University, Baltimore MD 21218. <sup>3</sup>Department of Cell Biology, Emory  
14 University School of Medicine, Atlanta GA 30322. <sup>4</sup>Department of Biology,  
15 Indiana University, Bloomington, Indiana 47405. <sup>5</sup>Verna and Marrs McLean  
16 Department of Biochemistry and Molecular Biology, McNair Medical Institute at  
17 the Robert and Janice McNair Foundation, Dan L. Duncan Cancer Center,  
18 Center for Drug Discovery, Department of Pharmacology and Chemical Biology,  
19 Baylor College of Medicine, Houston, TX, 77030, USA

20

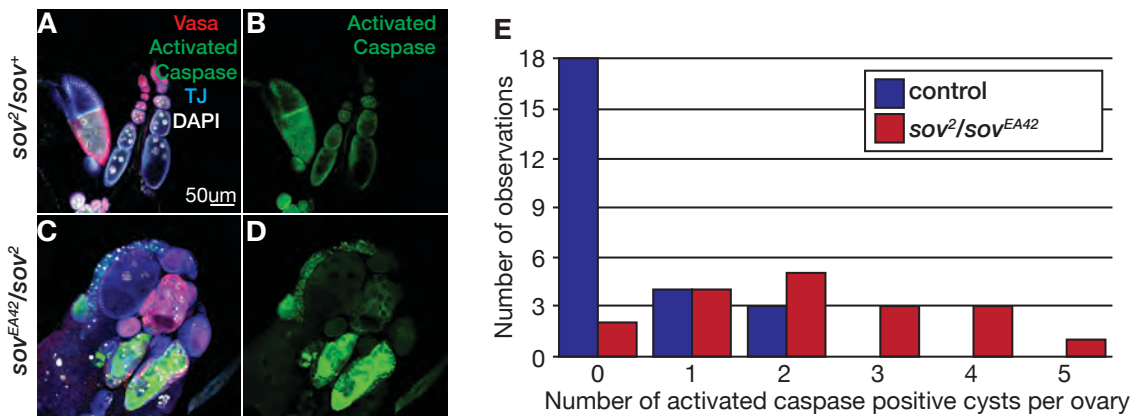

21  
 22 **Figure S1. Loss of *sov* leads to apoptosis of cysts in the ovary.** (A–D) Ovaries (5  
 23 days posteclosion) of the indicated genotypes were stained for anti-Vas (red), -Tj (blue),  
 24 -cleaved Caspase-3 (green), and DAPI (white). *sov* mutant ovaries had more cysts with  
 25 activated Caspase-3 than did controls, indicating that loss of *sov* leads to apoptosis in  
 26 the ovary. (E) Quantification of activated Caspase-3 cysts in *sov* mutants and controls.

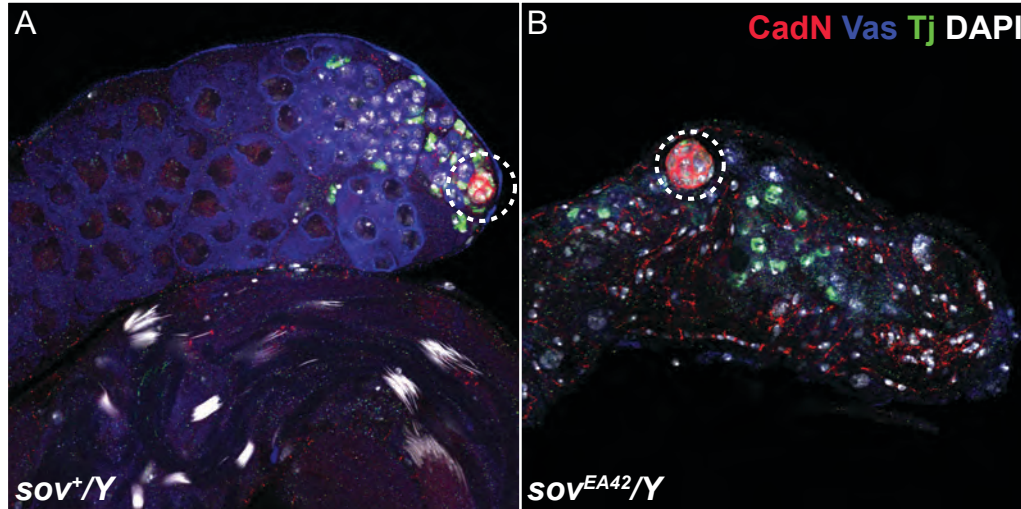

27  
 28 **Figure S2. Loss of germ cells in males escaping lethality.** (A, B) Testes (5 days  
 29 posteclosion) of the indicated genotypes were stained for anti-Vas (blue), -Tj (green), -  
 30 CadN (red), and DAPI (white). (A) Fertile *sov<sup>+</sup>/Y* testis contain developing  
 31 spermatogonia (blue) posterior to hub cells (red, dashed circle). (B) Escaper, sterile,  
 32 *sov<sup>EA42</sup>/Y* males that survive to adulthood contain rudimentary testes that are agametic  
 33 and therefore lack anti-Vas staining. The hub is usually present, but displaced from the  
 34 anterior end of the testes (red, dashed circle).

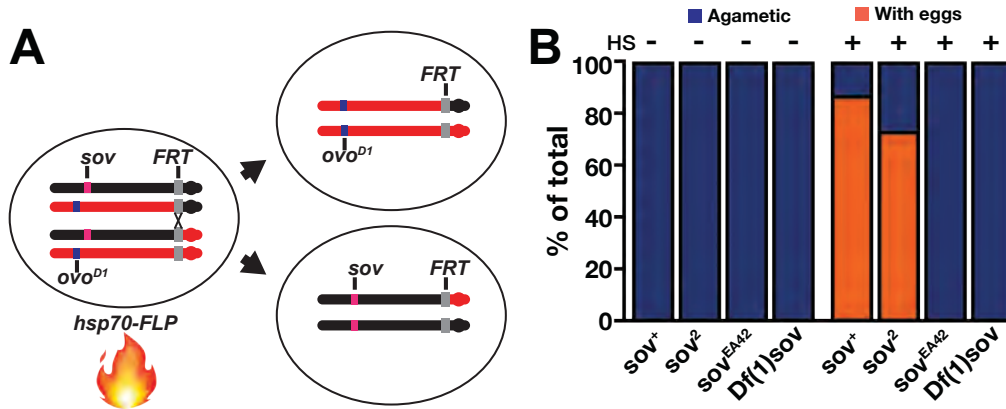

35  
36  
37  
38  
39  
40

**Figure S3. *sox* germline clonal analysis.** (A) Cartoon of dominant female sterile germline clonal analysis technique. Recombination occurs between homologs at FRT sequences only in the presence of heat-shock induced FLP expression. (B) Quantification of germline production from *sox* germline mutant clones. Heat shock (HS) was used (+) to induce expression of FLP, but was omitted (–, no HS) in controls.

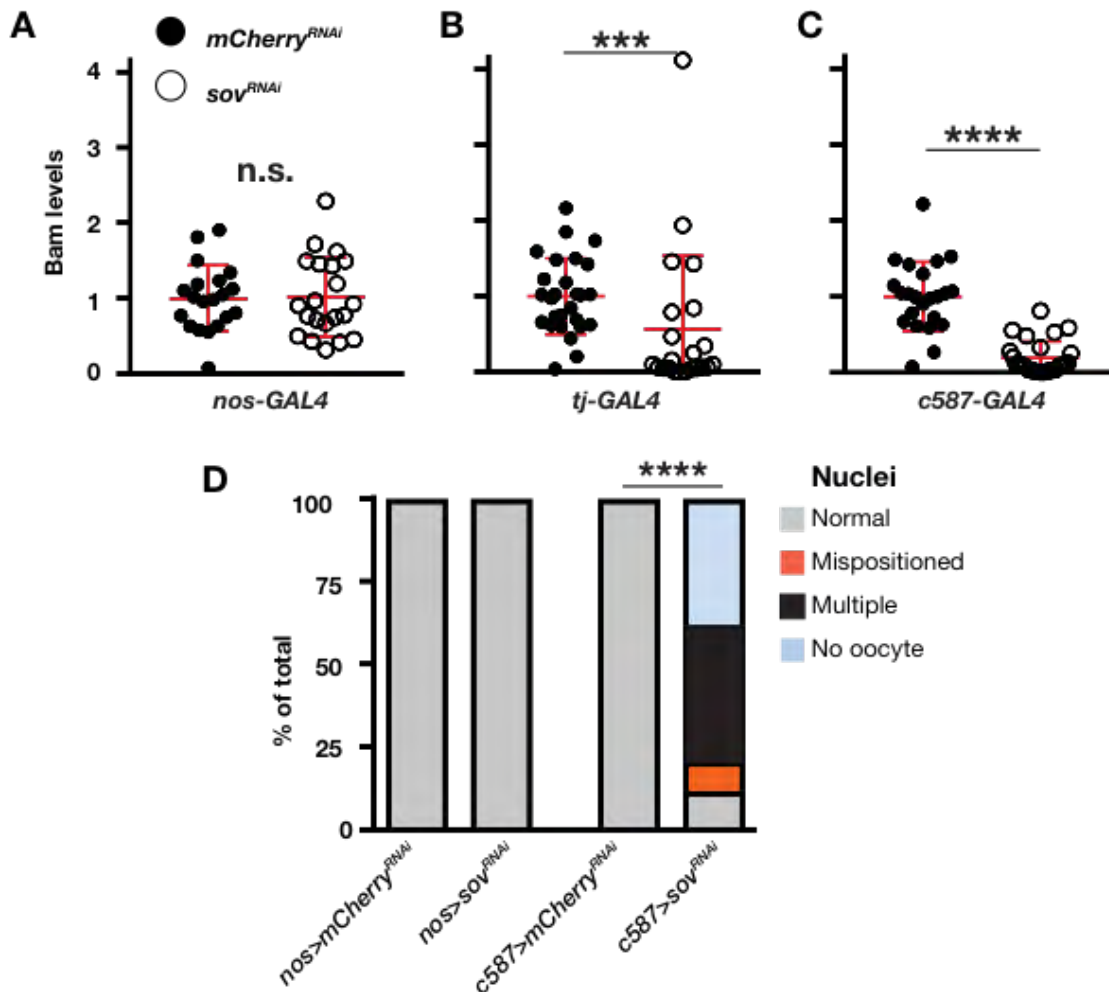

41  
 42 **Figure S4. Quantification of Bam staining intensity and Orb positive nuclei.** (A)  
 43 Knockdown of *sov* in germline cells does not alter Bam intensity levels. (B, C) In  
 44 contrast, knockdown of *sov* in somatic cells leads to significant reduction in Bam  
 45 intensity levels within region 1. \*\*\*,  $p < 0.001$ ; \*\*\*\*,  $p < 0.0001$ , n.s., not significant by two-  
 46 tailed t-test or Mann-Whitney test. Each dot represents a measurement from an  
 47 individual germarium. Data are mean  $\pm$  SD. Bam signals were measured from  
 48 individual ovarioles as integrated densities from maximum-intensity projections from the  
 49 region showing peak Bam signal intensity defined by the ROI tool (ImageJ) minus the  
 50 integrated density measured from a neighboring ROI to subtract background  
 51 fluorescence. Bam intensity was measured only from ovarioles containing  
 52 distinguishable germaria and/or egg chambers. (D) Quantification of Orb positive nuclei  
 53 in the indicated genotypes. Loss of *sov* in somatic cells leads to defects in Orb  
 54 localization. \*\*\*\*,  $p < 0.0001$ , Fisher's exact test. Shown are representative data from one  
 55 experiment following 2–3 biological replicates.

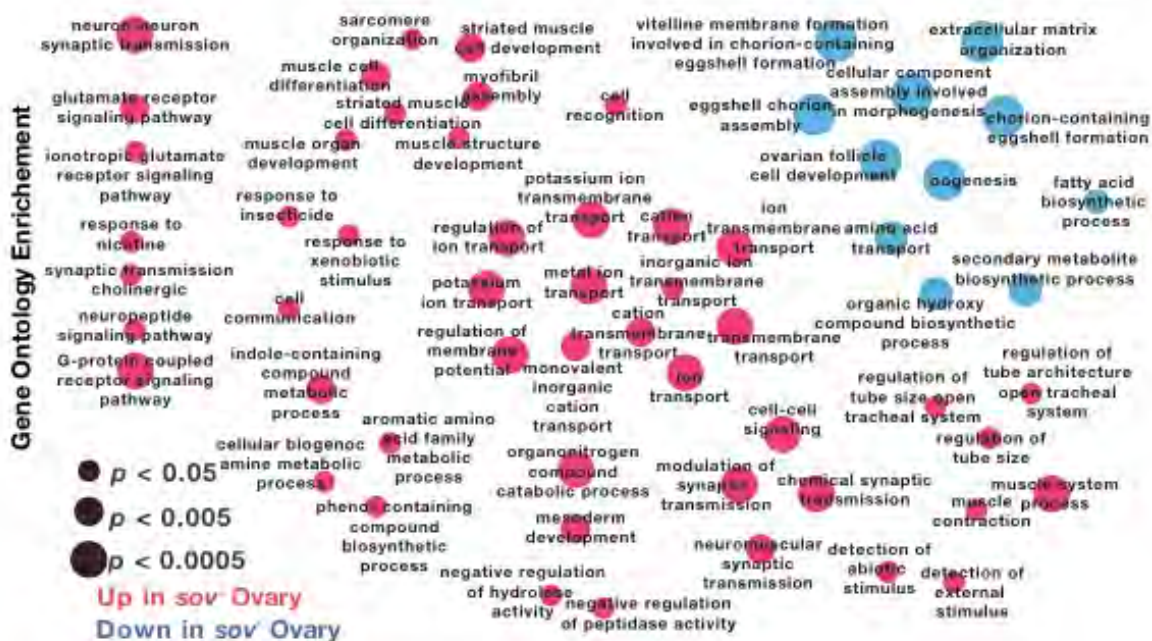

56

57

58

59

60

61

62

63

64

65

66

67

68

69

70

71

72

73

74

75

76

77

78

79

80

81

**Figure S5. Gene ontology terms of differentially expressed genes in sov mutant ovaries.** One sided GO enrichment analysis of gene lists that are differentially expressed in sov mutant ovaries. Red and blue circles show GO terms associated with derepressed and repressed genes respectively. Circle size denotes Bonferroni Step Down corrected  $p$ -values.

**Table S1. DNA sequencing results.** Modified output from snpEFF analysis. 'X Location' is the base that is modified from the reference. 'Reference' is the reference nucleotide at that position. 'Polymorphism' is the nucleotide change from the reference. 'Gene Effected' is the annotated gene that contains the polymorphism. 'Type' is the attribute given to the polymorphism change. 'Effect' denotes the predicted severity of the polymorphism. 'Codon Change' specifies if the polymorphism results in an amino acid change. The 'Found in Genotypes' states which genotypes contained the polymorphism. 'Allele specificity' is if the polymorphism can be specified to a single sov allele. Green rows indicate the ncRNA polymorphisms and yellow denote the predicted sov allele specific mutations.

**Table S2. Sov RNA-seq sample correlations.** The Pearsons correlation coefficient of the mean RNA-seq RPKM values for each genotype (row x column).

**Table S3. Differentially expressed genes in sov mutants vs. controls.** (A) Total number of genes differentially expressed in sov mutants for each genotype comparison. 'Genotype' is the sov mutant/RNAi line that is compared to the respective control. '> 2 FC ALL' are the number of genes and transposons with a greater than 2  $\log_2$  fold change and  $padj < 0.05$  according to DESeq2 analysis. '< -2 FC ALL' are the number of

82 genes and transposons with a less than  $-2 \log_2$  fold change and *padj* value  $<0.05$   
83 according to DESeq2 analysis. The same description applies to the rest of the columns  
84 but represent 'Genes' and 'Transposons' only. (B) DESeq2 gene expression analysis  
85 output for all *sov* mutants vs. all controls. 'FBgn' corresponds to the FlyBase gene  
86 identifier. 'BaseMean' is the mean normalized read count for *sov* and control samples.  
87 'log2FoldChange' is the  $\log_2$  normalized read count fold change in *sov* mutants vs.  
88 controls. 'padj' is the *fdr* adjusted *p-values* for differential expression. 'gene' refers to the  
89 common gene name.

90

91 **Table S4. GO term enrichment analysis.** Significantly enriched GO terms for gene  
92 sets differentially expressed in *sov* mutants with ClueGO analysis (Bindea et al. 2009).  
93 (A) Significantly enriched GO terms for *sov* mutant derepressed gene set. (B)  
94 Significantly enriched GO terms for *sov* mutant repressed gene set. 'GOID' is the  
95 identification number of the associated GO term. 'GOTerm' is the biological description  
96 of the GO term. 'Ontology Source' is the reference set the GO term is derived from.  
97 'GOLevels' is the hierarchical GO levels the terms are grouped from. '% Associated  
98 Genes' is the number of genes in the enrichment set over all the genes in the respective  
99 GO term. 'Nr. Genes' is the total number of genes in the enrichment set associated with  
100 the respective GO term. 'Associated Genes Found' are all the gene in the enrichment  
101 set that are part of that respective GO term.

102

103 **Table S5. FlyBase ART file.** Table containing all experimental materials used in the  
104 study.

105

106 **Table S6. Tissue Expression of derepressed genes in *sov* mutants.**  $\log_2$  fold  
107 change values from DESeq2 analysis of the derepressed genes in *sov* mutants that  
108 were expressed in all tissues. Each tissue comparison is to the sex-respective whole  
109 organism tissue expression. 'FBgn' corresponds to the FlyBase gene identifier. 'gene'  
110 refers to the common gene name. The following columns are the sex and tissue  $\log_2$   
111 fold change values.
